# Supplementary material
Source: PubMed Central journal article supplement (PMC4547145)
Supplement: mmc1.pdf [file mmc1.pdf]

**Biophysical Journal**

**Supporting Material**

**Dead-End Elimination with a Polarizable Force Field Repacks PCNA Structures**

Stephen D. LuCore,<sup>1</sup> Jacob M. Litman,<sup>2</sup> Kyle T. Powers,<sup>2</sup> Shibo Gao,<sup>2</sup> Ava M. Lynn,<sup>1</sup> William T. A. Tollefson,<sup>1</sup> Timothy D. Fenn,<sup>3</sup> M. Todd Washington,<sup>2</sup> and Michael J. Schnieders<sup>1,2,\*</sup>

<sup>1</sup>Department of Biomedical Engineering and <sup>2</sup>Department of Biochemistry, University of Iowa, Iowa City, Iowa; and <sup>3</sup>Boehringer Ingelheim, Ridgefield, Connecticut

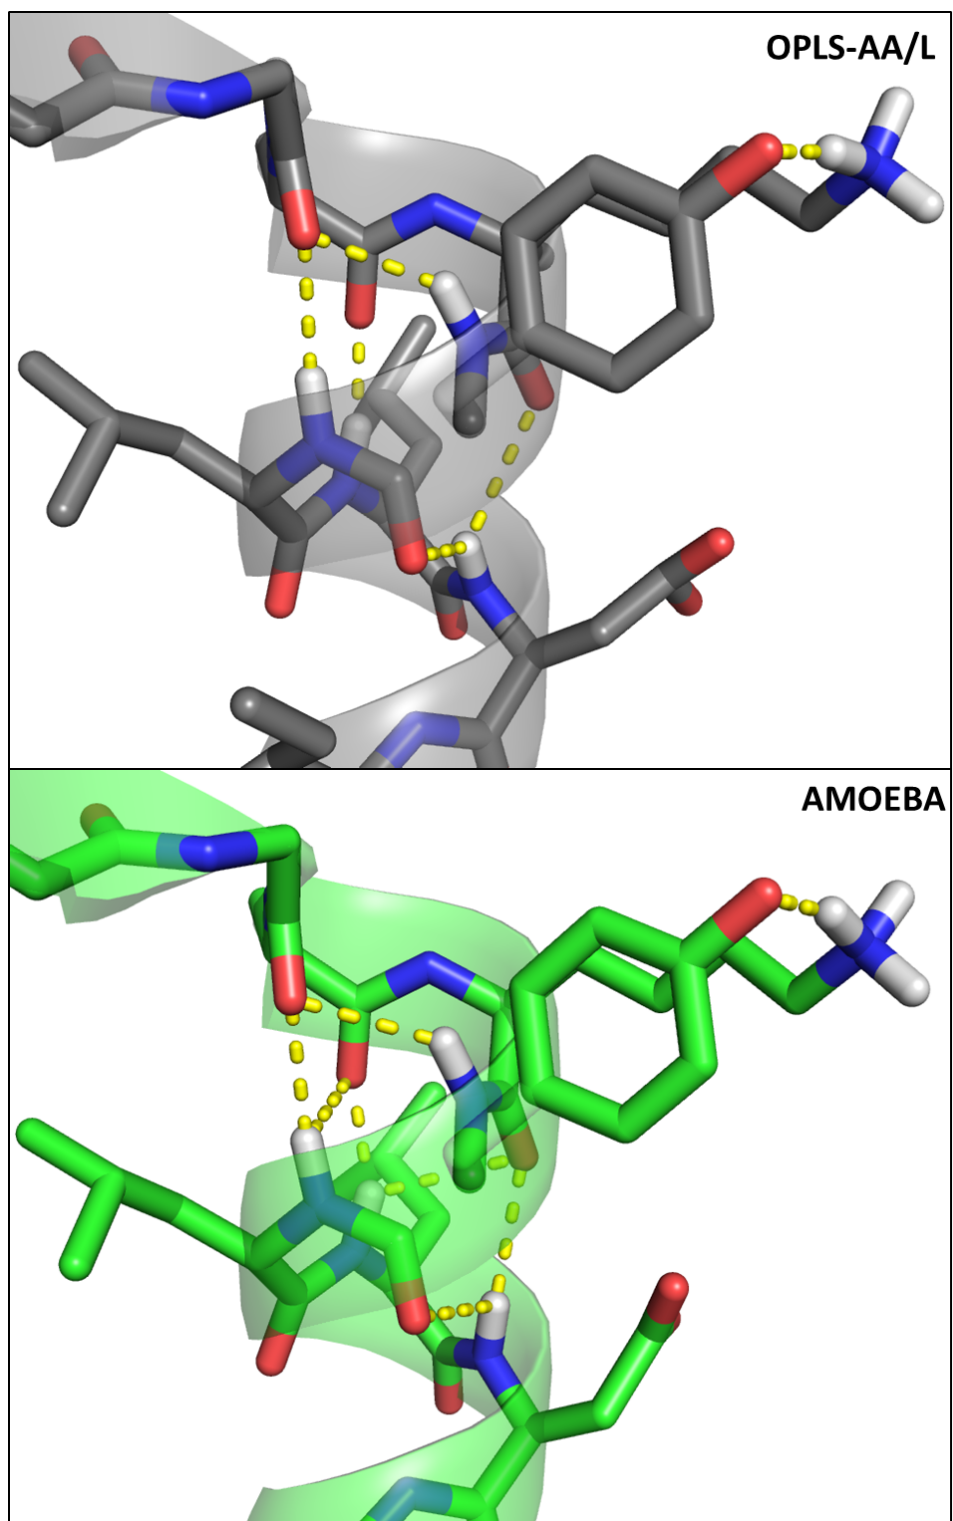

**Figure S1.** Hydrogen bonding for an  $\alpha$ -helix from wild type PCNA is shown after application of OPLS-AA/L pairwise DEE and AMOEBA many-body DEE. Hydrogen atoms not involved in hydrogen bonding have been hidden for clarity. The AMOEBA model (lower panel) shows two additional hydrogen bonds not present in the OPLS-AA/L model (upper panel) due to backbone nitrogen atoms of residue  $i$  donating to both the residue  $i+3$  and  $i+4$  carbonyl oxygen atoms.

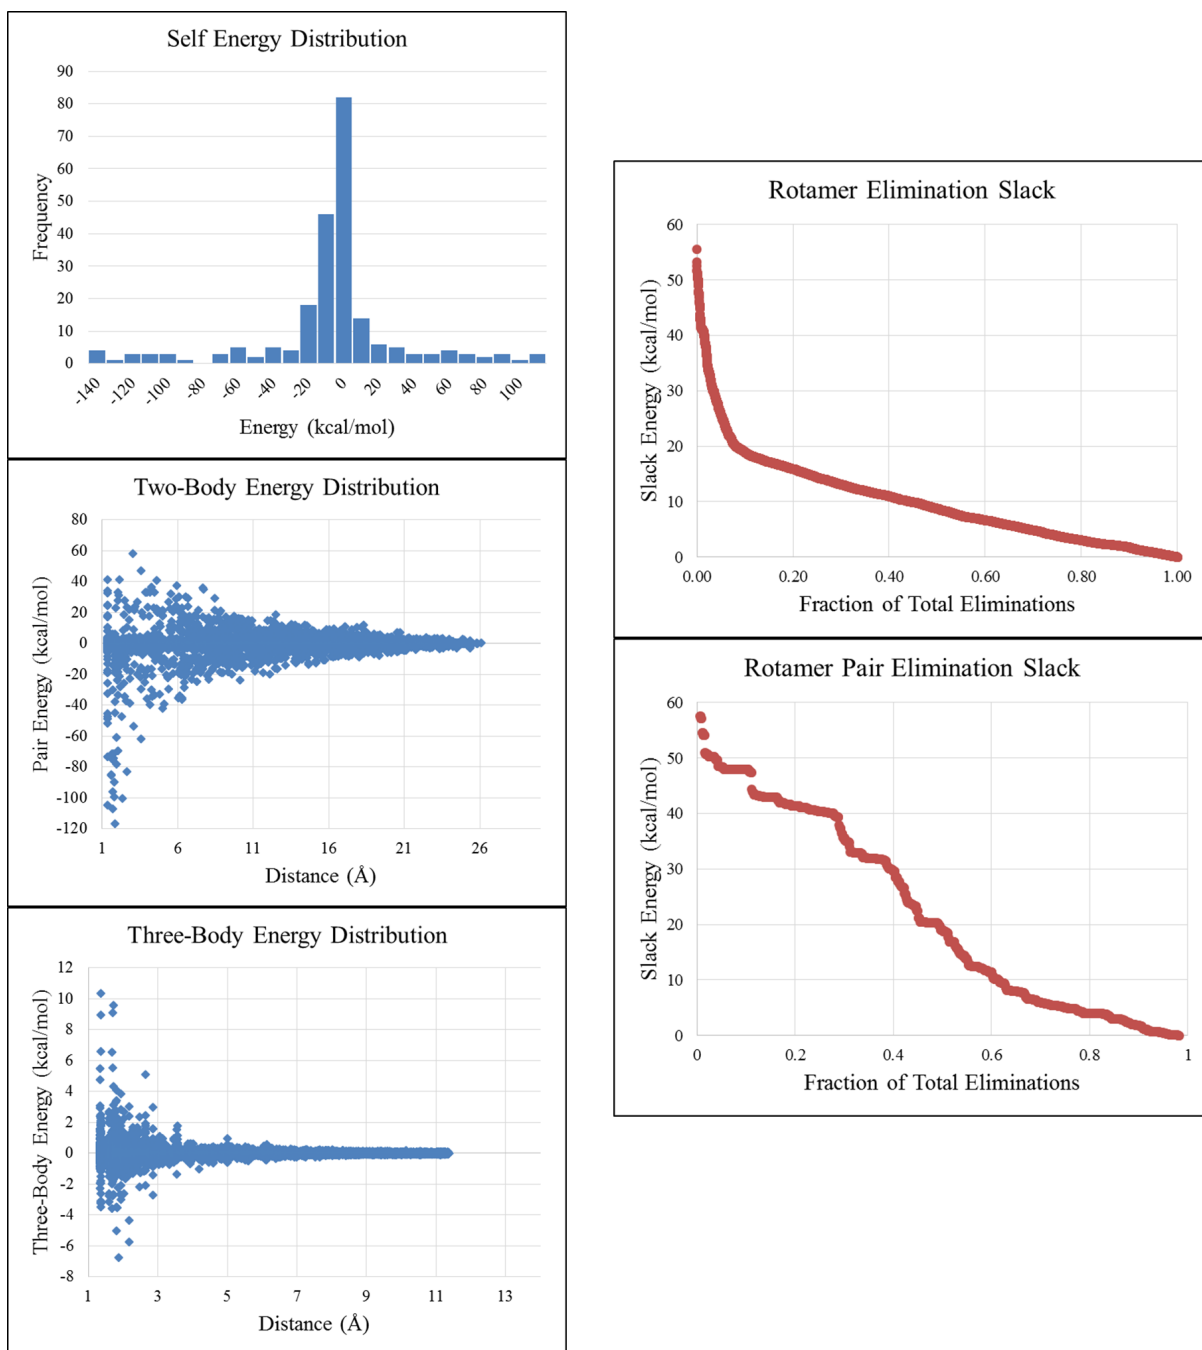

**Figure S2.** Shown to the left are distributions of self, 2-body, and 3-body energies from the wild type PCNA data as a function of distance. Shown to the right are sorted distributions of slack for rotamer and rotamer pair eliminations under AMOEBA many-body DEE for wild type PCNA (2 values for rotamer slack and 28 values for rotamer pair slack are greater than 60 kcal/mol and were not included). The maximum absolute 3-body energy is 10.4 kcal/mol, which is greater than 57% of the rotamer slack energies and 37% of the rotamer pair slack energies. Although it is infeasible to compute the distribution of all 4-body energies (there are more than 100 million), a subset of 1.9 million establishes their maximum absolute value to be approximately 1 kcal/mol (see Figure S3 below). We note that only 0.06% of rotamer slack energies and 0.06% of rotamer pair slack energies are less than 1 kcal/mol.

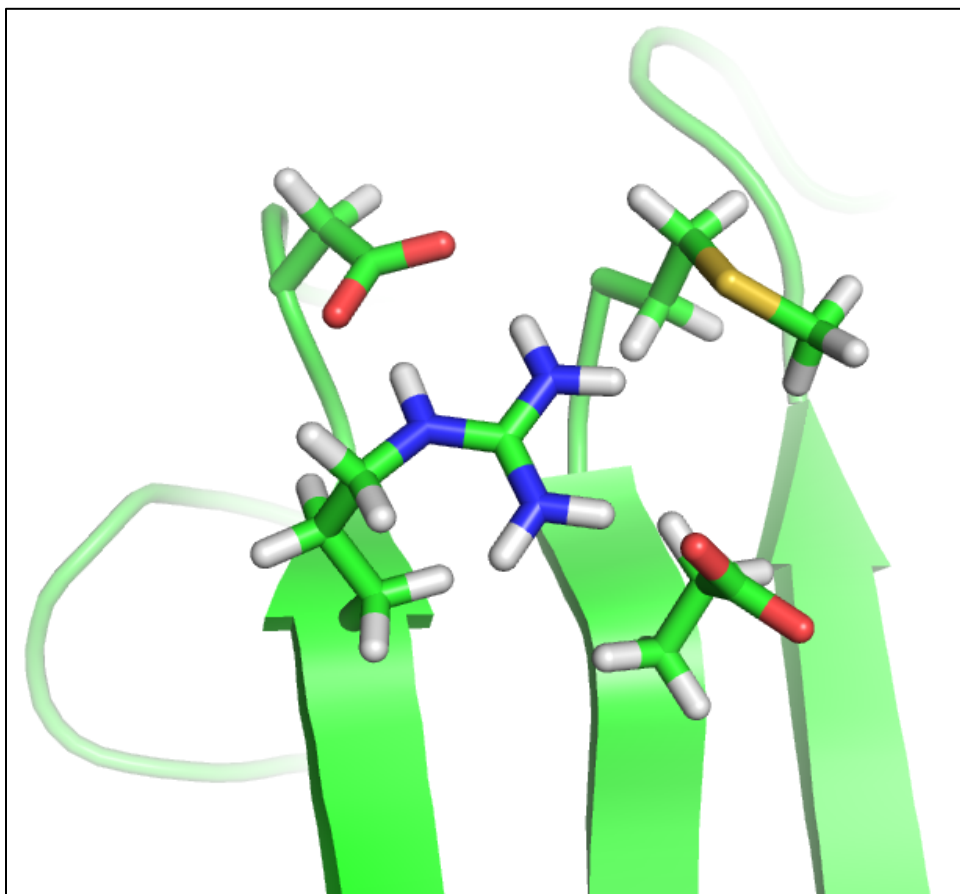

**Figure S3.** The shown collection of 4 residues from wild type PCNA produced the largest absolute magnitude 4-body energy among the subset of 1.9 million evaluated that contained the N-terminal methionine (-0.98 kcal/mol). The second largest 4-body energy identified was 0.39 kcal/mol and the average 4-body energy was  $-9e-07$  kcal/mol.

**Table S1.** Shown is quantification of hydrogen bonding at the PCNA subunit interface. Intra-molecular hydrogen bonds are those spanning either  $\beta\text{H}_1\text{-}\beta\text{I}_1$  or  $\beta\text{C}_1\text{-}\beta\text{D}_1$ . Inter-molecular hydrogen bonds are those spanning the subunit interface  $\beta\text{I}_1\text{-}\beta\text{D}_1$ . The original structural models do not show a clear trend in hydrogen bonding for the E113G and G178S mutants relative to wild type. However, the AMOEBA DEE repacked models reveal an increase in intra-subunit hydrogen bonding in the mutant structures that is consistent with reduced trimer stability.

| <b>Data Set</b> | <b>Model</b> | <b>Intra-molecular</b> |               | <b>Inter-molecular</b> |               | <b>Delta Change</b> |
|-----------------|--------------|------------------------|---------------|------------------------|---------------|---------------------|
|                 |              | <b>Total</b>           | <b>Change</b> | <b>Total</b>           | <b>Change</b> |                     |
| WT              | Original     | 22                     |               | 5                      |               |                     |
|                 | PDB_Redo     | 20                     |               | 5                      |               |                     |
|                 | OPLS-AA/L    | 29                     |               | 5                      |               |                     |
|                 | AMOEBA       | 28                     |               | 5                      |               |                     |
| 3F1W<br>(E133G) | Original     | 22                     | 0             | 4                      | -1            | +1                  |
|                 | PDB_Redo     | 22                     | 2             | 4                      | -1            | +3                  |
|                 | OPLS-AA/L    | 32                     | 3             | 5                      | 0             | +3                  |
|                 | AMOEBA       | 31                     | 3             | 6                      | +1            | +2                  |
| 3GPM<br>(G178S) | Original     | 22                     | 0             | 4                      | -1            | +1                  |
|                 | PDB_Redo     | 19                     | -1            | 5                      | 0             | -1                  |
|                 | OPLS-AA/L    | 33                     | 4             | 6                      | +1            | +3                  |
|                 | AMOEBA       | 34                     | 6             | 5                      | 0             | +6                  |

**Table S2.** Shown are coordinate RMSDs relative to deposited coordinates and mean deviations in bonds lengths and angle bends.

| Data Set    | Model     | Algorithm | RMSD (Å) |            | Mean Deviations |           |
|-------------|-----------|-----------|----------|------------|-----------------|-----------|
|             |           |           | All      | Side-Chain | Bond (Å)        | Angle (°) |
| 3F1W        | PDB_Redo  |           | 0.80     | 1.12       | 0.011           | 2.5       |
|             | OPLS-AA/L | Minimize  | 0.55     | 0.72       | 0.010           | 2.4       |
|             |           | + DEE     | 0.81     | 1.12       | 0.011           | 2.4       |
|             | AMOEBA    | Minimize  | 0.47     | 0.61       | 0.014           | 2.7       |
|             |           | + DEE     | 0.65     | 0.89       | 0.013           | 2.7       |
| 3GPM        | PDB_Redo  |           | 0.47     | 0.58       | 0.012           | 2.5       |
|             | OPLS-AA/L | Minimize  | 1.10     | 1.40       | 0.010           | 2.4       |
|             |           | + DEE     | 1.22     | 1.58       | 0.010           | 2.4       |
|             | AMOEBA    | Minimize  | 0.98     | 1.23       | 0.014           | 2.7       |
|             |           | + DEE     | 1.07     | 1.36       | 0.014           | 2.7       |
| 3GPN        | PDB_Redo  |           | 0.23     | 0.28       | 0.012           | 2.5       |
|             | OPLS-AA/L | Minimize  | 0.63     | 0.87       | 0.011           | 2.3       |
|             |           | + DEE     | 0.85     | 1.19       | 0.011           | 2.3       |
|             | AMOEBA    | Minimize  | 0.56     | 0.77       | 0.014           | 2.6       |
|             |           | + DEE     | 0.74     | 1.03       | 0.014           | 2.6       |
| 3LOW        | PDB_Redo  |           | 0.42     | 0.46       | 0.011           | 2.4       |
|             | OPLS-AA/L | Minimize  | 1.03     | 1.28       | 0.009           | 2.3       |
|             |           | + DEE     | 1.20     | 1.51       | 0.010           | 2.3       |
|             | AMOEBA    | Minimize  | 0.87     | 1.05       | 0.013           | 2.7       |
|             |           | + DEE     | 1.00     | 1.24       | 0.012           | 2.6       |
| 3L0X        | PDB_Redo  |           | 0.29     | 0.36       | 0.011           | 2.5       |
|             | OPLS-AA/L | Minimize  | 0.58     | 0.73       | 0.011           | 2.4       |
|             |           | + DEE     | 0.82     | 1.09       | 0.011           | 2.3       |
|             | AMOEBA    | Minimize  | 0.48     | 0.60       | 0.014           | 2.7       |
|             |           | + DEE     | 0.79     | 1.07       | 0.013           | 2.7       |
| 3L10        | PDB_Redo  |           | 0.45     | 0.52       | 0.011           | 2.4       |
|             | OPLS-AA/L | Minimize  | 1.05     | 1.30       | 0.009           | 2.3       |
|             |           | + DEE     | 1.24     | 1.58       | 0.010           | 2.4       |
|             | AMOEBA    | Minimize  | 0.85     | 1.03       | 0.013           | 2.7       |
|             |           | + DEE     | 1.06     | 1.31       | 0.013           | 2.7       |
| WT          | PDB_Redo  |           | 1.04     | 1.42       | 0.015           | 3.3       |
|             | OPLS-AA/L | Minimize  | 0.60     | 0.63       | 0.011           | 2.5       |
|             |           | + DEE     | 0.95     | 1.26       | 0.011           | 2.5       |
|             | AMOEBA    | Minimize  | 0.52     | 0.63       | 0.014           | 2.7       |
|             |           | + DEE     | 0.91     | 1.22       | 0.014           | 2.7       |
| <b>Mean</b> | PDB_Redo  |           | 0.53     | 0.68       | 0.012           | 2.6       |
|             | OPLS-AA/L | Minimize  | 0.79     | 0.99       | 0.010           | 2.4       |
|             |           | + DEE     | 1.03     | 1.36       | 0.010           | 2.4       |
|             | AMOEBA    | Minimize  | 0.67     | 0.84       | 0.014           | 2.7       |
|             |           | + DEE     | 0.89     | 1.16       | 0.013           | 2.7       |

**Table S3.** A comparison of structure quality metrics after AMOEBA DEE refinement using 2-body and 3-body approximations is shown. The AMOEBA 2-body optimization provides higher quality structures than OPLS-AA/L (see Table 2), however, 3-body optimization yields additional improvements beyond those of all other strategies.

| <b>PDB</b>  |                        |          |                         |                       | <b>MolProbity</b> |          | <b>Clash</b> |          | <b>Ramachandran</b> |               | <b>Poor</b>       |
|-------------|------------------------|----------|-------------------------|-----------------------|-------------------|----------|--------------|----------|---------------------|---------------|-------------------|
| <b>Res.</b> | <b>Refinement</b>      | <b>R</b> | <b>R<sub>free</sub></b> | <b>E<sub>FF</sub></b> | <b>Score</b>      | <b>%</b> | <b>Score</b> | <b>%</b> | <b>Out. %</b>       | <b>Fav. %</b> | <b>Rotamers %</b> |
| 3flw        | Original               | 23.46    | 25.87                   |                       | 2.81              | 81       | 35.3         | 65       | 0.4                 | 95.2          | 3.9               |
| 2.9 Å       | 2-body                 | 22.74    | 27.02                   | -257                  | 1.56              | 100      | 1.0          | 100      | 0.8                 | 94.1          | 3.0               |
|             | 3-body                 | 22.12    | 26.25                   | -129                  | 1.03              | 100      | 1.2          | 100      | 0.4                 | 96.4          | 0.4               |
| 3gpm        | Original               | 35.42    | 34.31                   |                       | 3.43              | 73       | 52.9         | 51       | 4.0                 | 89.3          | 7.5               |
| 3.8 Å       | 2-body                 | 24.13    | 27.20                   | -172                  | 1.41              | 100      | 0.0          | 100      | 4.8                 | 85.3          | 2.2               |
|             | 3-body                 | 24.42    | 27.25                   | -110                  | 1.33              | 100      | 0.0          | 100      | 4.4                 | 85.7          | 1.8               |
| 3gpn        | Original               | 23.81    | 27.29                   |                       | 2.19              | 91       | 11.8         | 92       | 0.0                 | 98.0          | 6.2               |
| 2.5 Å       | 2-body                 | 20.97    | 25.55                   | -307                  | 1.58              | 100      | 1.8          | 100      | 0.0                 | 96.0          | 3.1               |
|             | 3-body                 | 20.98    | 25.59                   | -351                  | 1.28              | 100      | 0.5          | 100      | 0.0                 | 96.4          | 3.1               |
| 3l0w        | Original               | 31.45    | 33.17                   |                       | 3.57              | 23       | 51.0         | 20       | 0.0                 | 92.3          | 15.8              |
| 2.8 Å       | 2-body                 | 27.10    | 29.66                   | -140                  | 1.34              | 100      | 0.4          | 100      | 0.6                 | 94.4          | 2.7               |
|             | 3-body                 | 27.12    | 29.60                   | -260                  | 1.17              | 100      | 1.0          | 100      | 0.6                 | 94.7          | 1.7               |
| 3l0x        | Original               | 24.27    | 25.65                   |                       | 2.79              | 86       | 15.0         | 97       | 0.0                 | 94.4          | 9.2               |
| 3.0 Å       | 2-body                 | 20.70    | 24.47                   | -117                  | 1.37              | 100      | 1.7          | 100      | 2.0                 | 93.2          | 0.4               |
|             | 3-body                 | 20.98    | 24.43                   | -125                  | 1.25              | 100      | 1.8          | 100      | 1.6                 | 92.8          | 0.4               |
| 3l10        | Original               | 31.83    | 34.36                   |                       | 3.56              | 23       | 51.8         | 20       | 0.0                 | 92.3          | 15.1              |
| 2.8 Å       | 2-body                 | 26.88    | 29.89                   | -319                  | 1.69              | 100      | 0.8          | 100      | 0.6                 | 92.6          | 4.4               |
|             | 3-body                 | 26.82    | 29.56                   | -360                  | 1.59              | 100      | 1.0          | 100      | 0.6                 | 91.6          | 3.4               |
| WT          | Original               | 24.89    | 27.25                   |                       | 1.65              | 100      | 5.5          | 100      | 0.4                 | 94.9          | 0.9               |
| 3.0 Å       | 2-body                 | 22.29    | 24.34                   | -665                  | 1.15              | 100      | 1.0          | 100      | 1.2                 | 94.9          | 0.9               |
|             | 3-body                 | 21.63    | 24.24                   | -760                  | 1.09              | 100      | 0.7          | 100      | 1.2                 | 94.9          | 0.9               |
| <b>Mean</b> | Original               | 27.88    | 29.70                   |                       | 2.86              | 68       | 31.9         | 64       | 0.7                 | 93.8          | 8.4               |
| 3.0 Å       | 2-body                 | 23.54    | 26.88                   | -282                  | 1.44              | 100      | 0.94         | 100      | 1.4                 | 92.9          | 2.4               |
|             | 3-body                 | 23.44    | 26.70                   | -299                  | 1.25              | 100      | 0.88         | 100      | 1.3                 | 93.2          | 1.7               |
|             | $\Delta$ 3- vs. 2-body | -0.10    | -0.18                   | -17                   | -0.19             | 0        | -0.06        | 0        | -0.2                | 0.3           | -0.7              |

**Table S4.** Run times by structure and method on a single 16-core compute node at 2.6GHz. OPLS-AA/L and AMOEBA are nearly equivalent for minimization due to the X-ray scattering term being the limiting factor. The cost of AMOEBA 3-body DEE is approximately 15x greater than OPLS-AA/L 2-body DEE due to 1) the increased cost of each energy evaluation and 2) computation of 3-body terms.

| <b>PDB ID</b> | <b>Force Field</b> | <b>Algorithm</b> | <b>Run Time</b> |
|---------------|--------------------|------------------|-----------------|
| 3flw          | OPLS-AA/L          | Minimize         | 35 sec          |
|               |                    | + DEE            | 25 hours        |
|               | AMOEBA             | Minimize         | 39 sec          |
|               |                    | + DEE            | 17 days         |
| 3gpm          | OPLS-AA/L          | Minimize         | 29 sec          |
|               |                    | + DEE            | 18 hours        |
|               | AMOEBA             | Minimize         | 30 sec          |
|               |                    | + DEE            | 18 days         |
| 3gpn          | OPLS-AA/L          | Minimize         | 23 sec          |
|               |                    | + DEE            | 11 hours        |
|               | AMOEBA             | Minimize         | 28 sec          |
|               |                    | + DEE            | 12 days         |
| 3l0w          | OPLS-AA/L          | Minimize         | 43 sec          |
|               |                    | + DEE            | 28 hours        |
|               | AMOEBA             | Minimize         | 51 sec          |
|               |                    | + DEE            | 15 days         |
| 3l0x          | OPLS-AA/L          | Minimize         | 30 sec          |
|               |                    | + DEE            | 18 hours        |
|               | AMOEBA             | Minimize         | 39 sec          |
|               |                    | + DEE            | 11 days         |
| 3l10          | OPLS-AA/L          | Minimize         | 80 sec          |
|               |                    | + DEE            | 29 hours        |
|               | AMOEBA             | Minimize         | 53 sec          |
|               |                    | + DEE            | 16 days         |
| WT            | OPLS-AA/L          | Minimize         | 30 sec          |
|               |                    | + DEE            | 20 hours        |
|               | AMOEBA             | Minimize         | 36 sec          |
|               |                    | + DEE            | 20 days         |
| <b>Mean</b>   | OPLS-AA/L          | Minimize         | 39 sec          |
|               |                    | + DEE            | 21 hours        |
|               | AMOEBA             | Minimize         | 39 sec          |
|               |                    | + DEE            | 15 days         |



## Supplemental Derivations

### I. Many-Body Inclusive Singles Elimination Criterion

We start from the knowledge that any given point in the global rotamer space has a minimum energy equal to the global minimum energy conformation.

$$E_{\text{global}} \geq E_{\text{GMEC}} \quad \text{Equation 1}$$

We denote a superscript  $g$  as being the rotamer of a particular residue as it exists in the global minimum energy conformation.

$$E_{\text{global}} = E_{BB} + E(r_i^\alpha) + \sum_{j,l}^n \{E(r_j^g) + \sum_{k,l'}^n [E(r_j^g, r_k^g) + \sum_{l''}^n (E(r_j^g, r_k^g, r_{l''}^g) + \dots)]\} + \sum_{j,l}^n \{E(r_i^\alpha, r_j^g) + \sum_{k,l'}^n [E(r_i^\alpha, r_j^g, r_k^g) + \sum_{l''}^n (E(r_i^\alpha, r_j^g, r_k^g, r_{l''}^g) + \dots)]\} \quad \text{Equation 2}$$

$$E_{\text{GMEC}} = E_{BB} + E(r_i^g) + \sum_{j,l}^n \{E(r_j^g) + \sum_{k,l'}^n [E(r_j^g, r_k^g) + \sum_{l''}^n (E(r_j^g, r_k^g, r_{l''}^g) + \dots)]\} + \sum_{j,l}^n \{E(r_i^g, r_j^g) + \sum_{k,l'}^n [E(r_i^g, r_j^g, r_k^g) + \sum_{l''}^n (E(r_i^g, r_j^g, r_k^g, r_{l''}^g) + \dots)]\} \quad \text{Equation 3}$$

Herein  $E_{BB}$  is the backbone energy,  $E(r_i^\alpha)$  is the self-energy of residue  $i$  in rotamer  $\alpha$ ,  $E(r_i^\alpha, r_j^\beta)$  is the two-body energy of residues  $i, j$  in rotamers  $\alpha, \beta$  and so on. Self, two-body, and many-body energies are as defined in the main text. Ellipses signify the presence of higher-order terms out to  $n$ -body, where  $n$  is the number of residues in the system. After explicitly enumerating all energy components including many-body energy, we substitute Eqs. 2 and 3 into Equation 1. Terms without dependence on  $r_i$  cancel out. We then find an expression for the remaining portion that doesn't require knowledge of the GMEC conformation.

$$\begin{cases} \max_s \left[ E(r_i^\alpha, r_k^s) + \sum_{l'}^n E(r_i^\alpha, r_k^s, r_{l'}^g) + \dots \right] \geq E(r_i^\alpha, r_k^g) + \sum_{l'}^n E(r_i^\alpha, r_k^g, r_{l'}^g) + \dots \\ \min_s \left[ E(r_i^g, r_k^s) + \sum_{l'}^n E(r_i^g, r_k^s, r_{l'}^g) + \dots \right] \leq E(r_i^g, r_k^g) + \sum_{l'}^n E(r_i^g, r_k^g, r_{l'}^g) + \dots \end{cases} \quad \text{Equation 4}$$

$$\begin{cases} \max_t [E(r_i^\alpha, r_k^s, r_l^t) + \dots] \geq E(r_i^\alpha, r_k^s, r_l^g) + \dots \\ \min_t [E(r_i^g, r_k^s, r_l^t) + \dots] \leq E(r_i^g, r_k^s, r_l^g) + \dots \end{cases}$$

**Equation 5**

$$\begin{cases} \max_s \left[ E(r_i^\alpha, r_k^s) + \sum_{l'}^n \max_t (E(r_i^\alpha, r_k^s, r_l^t)) + \dots \right] \geq E(r_i^\alpha, r_k^g) + \sum_{l'}^n E(r_i^\alpha, r_k^g, r_l^g) + \dots \\ \min_s \left[ E(r_i^g, r_k^s) + \sum_{l'}^n \min_t (E(r_i^g, r_k^s, r_l^t)) + \dots \right] \leq E(r_i^g, r_k^g) + \sum_{l'}^n E(r_i^g, r_k^g, r_l^g) + \dots \end{cases}$$

**Equation 6**

Expressing the substituted Eq. 1 using the left-hand side of Eq. 6 yields the final singles elimination criterion.

## II. Many-Body Inclusive Pairwise Elimination Criterion

$$E_{\text{global}} \geq E_{\text{GMEC}}$$

**Equation 7**

$$\begin{aligned} & E(r_i^\alpha) + E(r_j^\beta) + E(r_i^\alpha, r_j^\beta) + \sum_{k'}^n \{ E(r_i^\alpha, r_k^g) + E(r_j^\beta, r_k^g) + E(r_i^\alpha, r_j^\beta, r_k^g) + \\ & \sum_{l'}^n [ E(r_i^\alpha, r_k^g, r_l^g) + E(r_j^\beta, r_k^g, r_l^g) + E(r_i^\alpha, r_j^\beta, r_k^g, r_l^g) \dots ] \} \geq \\ & E(r_i^g) + E(r_j^g) + E(r_i^g, r_j^g) + \sum_{k'}^n \{ E(r_i^g, r_k^g) + E(r_j^g, r_k^g) + E(r_i^g, r_j^g, r_k^g) + \\ & \sum_{l'}^n [ E(r_i^g, r_k^g, r_l^g) + E(r_j^g, r_k^g, r_l^g) + E(r_i^g, r_j^g, r_k^g, r_l^g) \dots ] \} \end{aligned}$$

**Equation 8**

We begin again from Equation 7. After explicitly enumerating all energy components of  $E_{\text{global}}$ ,  $E_{\text{GMEC}}$  and substituting, all terms not involving  $r_i$  or  $r_j$  cancel out. We then find expressions for the remaining terms that do not require knowledge of the GMEC configuration.

$$\begin{aligned}
& \max_s \left[ E(r_i^\alpha, r_k^s) + E(r_j^\beta, r_k^s) + E(r_i^\alpha, r_j^\beta, r_k^s) \right. \\
& \quad \left. + \sum_{l'}^n \left( E(r_i^\alpha, r_k^s, r_l^g) + E(r_j^\beta, r_k^s, r_l^g) + E(r_i^\alpha, r_j^\beta, r_k^s, r_l^g) + \dots \right) \right] \\
& \geq E(r_i^\alpha, r_k^g) + E(r_j^\beta, r_k^g) + E(r_i^\alpha, r_j^\beta, r_k^g) \\
& \quad + \sum_{l'}^n \left( E(r_i^\alpha, r_k^g, r_l^g) + E(r_j^\beta, r_k^g, r_l^g) + E(r_i^\alpha, r_j^\beta, r_k^g, r_l^g) + \dots \right)
\end{aligned}$$

**Equation 9**

$$\begin{aligned}
& \min_s \left[ E(r_i^g, r_k^s) + E(r_j^g, r_k^s) + E(r_i^g, r_j^g, r_k^s) \right. \\
& \quad \left. + \sum_{l'}^n \left( E(r_i^g, r_k^s, r_l^g) + E(r_j^g, r_k^s, r_l^g) + E(r_i^g, r_j^g, r_k^s, r_l^g) + \dots \right) \right] \\
& \leq E(r_i^g, r_k^g) + E(r_j^g, r_k^g) + E(r_i^g, r_j^g, r_k^g) \\
& \quad + \sum_{l'}^n \left( E(r_i^g, r_k^g, r_l^g) + E(r_j^g, r_k^g, r_l^g) + E(r_i^g, r_j^g, r_k^g, r_l^g) + \dots \right)
\end{aligned}$$

**Equation 10**

$$\begin{aligned}
& \max_t \left[ E(r_i^\alpha, r_k^s, r_l^t) + E(r_j^\beta, r_k^s, r_l^t) + E(r_i^\alpha, r_j^\beta, r_k^s, r_l^t) + \dots \right] \\
& \quad \geq E(r_i^\alpha, r_k^s, r_l^g) + E(r_j^\beta, r_k^s, r_l^g) + E(r_i^\alpha, r_j^\beta, r_k^s, r_l^g) + \dots \\
& \min_t \left[ E(r_i^g, r_k^s, r_l^t) + E(r_j^g, r_k^s, r_l^t) + E(r_i^g, r_j^g, r_k^s, r_l^t) + \dots \right] \\
& \quad \leq E(r_i^g, r_k^s, r_l^g) + E(r_j^g, r_k^s, r_l^g) + E(r_i^g, r_j^g, r_k^s, r_l^g) + \dots
\end{aligned}$$

**Equation 11**

Substituting Eq. 11 into Eqs. 9 and 10, we get:

$$\begin{aligned}
& \max_s \left[ E(r_i^\alpha, r_k^s) + E(r_j^\beta, r_k^s) + E(r_i^\alpha, r_j^\beta, r_k^s) \right. \\
& \quad \left. + \sum_{l'}^n \max_t \left( E(r_i^\alpha, r_k^s, r_l^t) + E(r_j^\beta, r_k^s, r_l^t) + E(r_i^\alpha, r_j^\beta, r_k^s, r_l^t) + \dots \right) \right] \\
& \geq E(r_i^\alpha, r_k^g) + E(r_j^\beta, r_k^g) + E(r_i^\alpha, r_j^\beta, r_k^g) \\
& \quad + \sum_{l'}^n \left( E(r_i^\alpha, r_k^g, r_l^g) + E(r_j^\beta, r_k^g, r_l^g) + E(r_i^\alpha, r_j^\beta, r_k^g, r_l^g) + \dots \right)
\end{aligned}$$

**Equation 12**

$$\begin{aligned}
& \min_s \left[ E(r_i^g, r_k^s) + E(r_j^g, r_k^s) + E(r_i^g, r_j^g, r_k^s) \right. \\
& \quad \left. + \sum_{l'}^n \min_t (E(r_i^g, r_k^s, r_l^t) + E(r_j^g, r_k^s, r_l^t) + E(r_i^g, r_j^g, r_k^s, r_l^t) + \dots) \right] \\
& \leq E(r_i^g, r_k^g) + E(r_j^g, r_k^g) + E(r_i^g, r_j^g, r_k^g) \\
& \quad + \sum_{l'}^n E(r_i^g, r_k^g, r_l^g) + E(r_j^g, r_k^g, r_l^g) + E(r_i^g, r_j^g, r_k^g, r_l^g) + \dots
\end{aligned}$$

**Equation 13**

Expressing Equation 7 using the left-hand side of Eqs. 12 and 13 (for  $E_{global}$  and  $E_{GMEC}$  respectively) yields the final pairwise elimination criterion.

### III. Many-Body Generalized Goldstein Singles Elimination Criterion

We begin from the substituted Eqs 1 through 3.

$$\begin{aligned}
& E(r_i^\alpha) + \sum_{j'}^n \{ E(r_i^\alpha, r_j^g) + \sum_{k'}^n [ E(r_i^\alpha, r_j^g, r_k^g) + \sum_{l'}^n ( E(r_i^\alpha, r_j^g, r_k^g, r_l^g) + \dots ) ] \} \geq \\
& E(r_i^g) + \sum_{j'}^n \{ E(r_i^g, r_j^g) + \sum_{k'}^n [ E(r_i^g, r_j^g, r_k^g) + \sum_{l'}^n ( E(r_i^g, r_j^g, r_k^g, r_l^g) + \dots ) ] \}
\end{aligned}$$

**Equation 14**

In contrast to the original singles elimination derivation, we first subtract the right-hand side before applying the min operator.

$$\begin{aligned}
& E(r_i^\alpha) - E(r_i^g) + \sum_{j'}^n \{ E(r_i^\alpha, r_j^g) - E(r_i^g, r_j^g) + \sum_{k'}^n [ E(r_i^\alpha, r_j^g, r_k^g) - E(r_i^g, r_j^g, r_k^g) + \\
& \quad \sum_{l'}^n ( E(r_i^\alpha, r_j^g, r_k^g, r_l^g) - E(r_i^g, r_j^g, r_k^g, r_l^g) \dots ) ] \} \geq 0
\end{aligned}$$

**Equation 15**

$$\begin{aligned}
& \min_s \left\{ E(r_i^\alpha, r_j^s) - E(r_i^g, r_j^s) \right. \\
& \quad + \sum_{\substack{k' \\ n}}^n \left[ E(r_i^\alpha, r_j^s, r_k^g) - E(r_i^g, r_j^s, r_k^g) \right. \\
& \quad \left. \left. + \sum_{l'}^n (E(r_i^\alpha, r_j^s, r_k^g, r_l^g) - E(r_i^g, r_j^s, r_k^g, r_l^g) \dots) \right] \right\} \leq \\
& E(r_i^\alpha, r_j^g) - E(r_i^g, r_j^g) \\
& \quad + \sum_{\substack{k' \\ n}}^n \left[ E(r_i^\alpha, r_j^g, r_k^g) - E(r_i^g, r_j^g, r_k^g) \right. \\
& \quad \left. + \sum_{l'}^n (E(r_i^\alpha, r_j^g, r_k^g, r_l^g) - E(r_i^g, r_j^g, r_k^g, r_l^g) \dots) \right]
\end{aligned}$$

**Equation 16**

$$\begin{aligned}
& \min_t \left[ E(r_i^\alpha, r_j^s, r_k^t) - E(r_i^g, r_j^s, r_k^t) + \sum_{l'}^n (E(r_i^\alpha, r_j^s, r_k^t, r_l^g) - E(r_i^g, r_j^s, r_k^t, r_l^g) \dots) \right] \leq \\
& E(r_i^\alpha, r_j^s, r_k^g) - E(r_i^g, r_j^s, r_k^g) + \sum_{l'}^n (E(r_i^\alpha, r_j^s, r_k^g, r_l^g) - E(r_i^g, r_j^s, r_k^g, r_l^g) \dots)
\end{aligned}$$

**Equation 17**

$$\min_u (E(r_i^\alpha, r_j^s, r_k^t, r_l^u) - E(r_i^g, r_j^s, r_k^t, r_l^u) \dots) \leq (E(r_i^\alpha, r_j^s, r_k^t, r_l^g) - E(r_i^g, r_j^s, r_k^t, r_l^g) \dots)$$

**Equation 18**

As before, we then identify max and min inequalities that relieve us of reliance on knowing  $g$ . Substituting Eqs. 16-18 into Eq. 15, we arrive at the general Goldstein criterion.

#### IV. Many-Body Generalized Goldstein Pairwise Elimination Criterion

This derivation follows from the many-body Goldstein singles elimination in the same fashion that the original pairwise elimination followed from the original singles elimination.

$$\begin{aligned}
& E(r_i^\alpha) + E(r_j^\beta) + E(r_i^\alpha, r_j^\beta) + \sum_{k'}^n \{ E(r_i^\alpha, r_k^g) + E(r_j^\beta, r_k^g) + E(r_i^\alpha, r_j^\beta, r_k^g) + \\
& \sum_{l'}^n [ E(r_i^\alpha, r_k^g, r_l^g) + E(r_j^\beta, r_k^g, r_l^g) + E(r_i^\alpha, r_j^\beta, r_k^g, r_l^g) + \dots ] \} \geq
\end{aligned}$$

$$E(r_i^g) + E(r_j^g) + E(r_i^g, r_j^g) + \sum_{k'}^n \{E(r_i^g, r_k^g) + E(r_j^g, r_k^g) + E(r_i^g, r_j^g, r_k^g) + \sum_{l'}^n [E(r_i^g, r_k^g, r_l^g) + E(r_j^g, r_k^g, r_l^g) + E(r_i^g, r_j^g, r_k^g, r_l^g) + \dots]\}$$

**Equation 19**

$$E(r_i^\alpha) - E(r_i^g) + E(r_j^\beta) - E(r_j^g) + E(r_i^\alpha, r_j^\beta) - E(r_i^g, r_j^g) + \sum_{k'}^n \{E(r_i^\alpha, r_k^g) - E(r_i^g, r_k^g) + E(r_j^\beta, r_k^g) - E(r_j^g, r_k^g) + E(r_i^\alpha, r_j^\beta, r_k^g) - E(r_i^g, r_j^g, r_k^g) + \sum_{l'}^n [E(r_i^\alpha, r_k^g, r_l^g) - E(r_i^g, r_k^g, r_l^g) + E(r_j^\beta, r_k^g, r_l^g) - E(r_j^g, r_k^g, r_l^g) + E(r_i^\alpha, r_j^\beta, r_k^g, r_l^g) - E(r_i^g, r_j^g, r_k^g, r_l^g) + \dots]\} \geq 0$$

**Equation 20**

$$\min_s [E(r_i^\alpha, r_k^s) - E(r_i^g, r_k^s) + E(r_j^\beta, r_k^s) - E(r_j^g, r_k^s) + E(r_i^\alpha, r_j^\beta, r_k^s) + E(r_i^g, r_j^g, r_k^s) + \dots] \leq E(r_i^\alpha, r_k^g) - E(r_i^g, r_k^g) + E(r_j^\beta, r_k^g) - E(r_j^g, r_k^g) + E(r_i^\alpha, r_j^\beta, r_k^g) + E(r_i^g, r_j^g, r_k^g) + \dots$$

**Equation 21**

Downstream min and max operators are applied just as before and are substituted into Eq. 20 to yield the many-body generalized pairwise Goldstein criterion.
